# Supplementary material
Source: publisher site journal article supplement (http://www.degruyter.com/publication/journal_key/FCA/downloadAsset/FCA_Reviewer%20Form.pdf)
Supplement: Supplementary file 1 [file FCA_Reviewer%20Form.pdf]

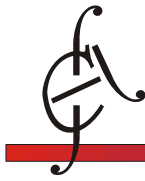

Published by: Institute of Mathematics and Informatics – Bulg. Academy of Sciences, Sofia  
(1998-2010); by Versita, Warsaw and Springer-Verlag, Wien (2011-2014);  
by Walter de Gruyter GmbH, Berlin (since 2015)

## FCAA - REVIEW FORM

### 1. Paper Identification: FCAA # ..... / .....

Title: .....

Author(s) Name(s): .....

---

### 2. Referee's Judgement: (For the criteria below, *pls. choose a mark* among: 5-Excellent; 4-Good; 3-Average; 2-Below Average; 1-Poor)

\* Importance, significance for FCAA audience and value of contribution: ....  
(Short Comments) .....

\* Logical and formal correctness: ....  
(Short Comments) .....

\* Proper crediting / citing of related literature: ....  
(Short Comments) .....

\* Clarity, structure and style of presentation (for experienced audience): ....  
(Short Comments) .....

\* English grammar / spelling: ....  
(Short Comments) .....

\* Technical accomplishment: .....  
(Short Comments) .....

---

### 3. Comments / Suggestions to the author:

.....  
.....  
.....

---

**4. Managing Editor's judgement on (to be filled by the Editor):**

- \* Diversity of Authorship / Geographical Distribution: .....
- \* Diversity of Subjects (if not in primary areas of FCAA): .....
- \* Quality of LaTeX typesetting, general: .....
  - to allow proper internal links .....
  - full and well structured Refs to allow Reference linking .....
- \* Overall impression of technicality: .....

---

**5. Referee's Recommendation: .....**

Choose one of:

- \* Accept as is / \* Acceptable after minor revisions suggested /
- \* Major revision suggested / \* Reject

---

**6. Referee's suggestion about category: .....**

Choose among:

- \* Research paper / \* Expository survey / \* Short Note / \* Open Problem / \* Other category

===== **CONFIDENTIAL PART**, to be seen ONLY by Editor =====  
(Pls., go on separate sheet !)

**7. Referee Info**

Name: .....  
E-mail: .....  
Affiliation (Institution, Country): .....

---

**8. Confidential comments to the editor: .....**

---

Reviewer's name: .....

Date: ..... .....

Please, return this review in electronic form, by E-mail: [virginia@diogenes.bg](mailto:virginia@diogenes.bg) , to:

---

Managing Editor of FCAA Journal – Virginia Kiryakova  
Institute of Mathematics and Informatics - Bulgarian Academy of Sciences  
'Acad. G. Bontchev' Str., Block 8, Sofia 1113 • Bulgaria  
E-mail: [virginia@diogenes.bg](mailto:virginia@diogenes.bg) • [fcaa@math.bas.bg](mailto:fcaa@math.bas.bg) • Fax: +359 2 947 8608
